# Supplementary material for: Doxycycline Alters Metabolism and Proliferation of Human Cell Lines
Source: PubMed Central journal article supplement (PMC3669316; doi:10.1371/journal.pone.0064561), 2013-05-31

SNR

Control

Dox

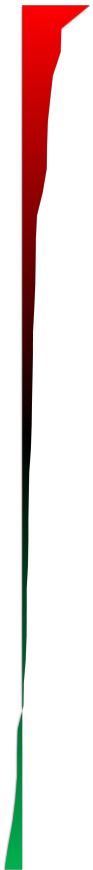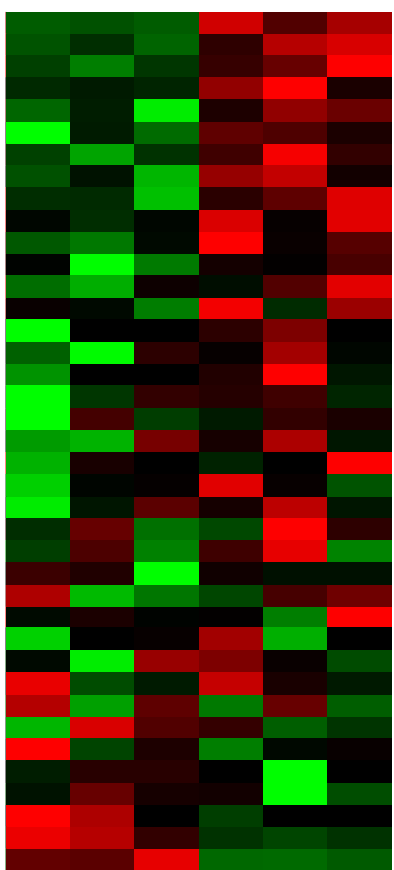

ALDH3A1 /// ALDH1A3 /// ALDH3B1 /// ALDH3B2  
 AKR1A1  
 PCK1 /// PCK2  
 GPI  
 PGM1 /// PGM2  
 PGLS  
**PFKL /// PFKM /// PFKP**  
 RPIA  
 PGK1 /// PGK2  
 ADH1A /// ADH1B /// ADH1C /// ADH4 /// ADH5 /// ADH6 /// ADH7  
**HK1 /// HK2 /// HK3 /// HKDC1**  
 PRPS1L1 /// PRPS1 /// PRPS2  
 PDHA1 /// PDHA2 /// PDHB  
 GCK  
 TPI1  
 ADPGK  
 H6PD  
 ACSS2 /// ACSS1  
**G6PC /// G6PC2**  
 TALDO1  
 LDHAL6A /// LDHA /// LDHB /// LDHC /// LDHAL6B  
**FBP1 /// FBP2**  
 TKT /// TKTL1 /// TKTL2  
 PGAM4 /// PGAM1 /// PGAM2 /// BPGM  
 PGD  
 RPE /// LOC729020  
 RBKS  
 GALM  
 RGN  
 DERA  
 BPGM  
 G6PD  
 GAPDH /// GAPDHS  
 DLD  
 ENO1 /// ENO2 /// ENO3  
 DLAT  
**PKLR /// PKM2**  
 ALDH2 /// ALDH1B1 /// ALDH9A1 /// ALDH3A2 /// ALDH7A1  
 ALDOA /// ALDOB /// ALDOC

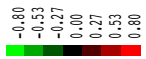

SNR

Control

Dox

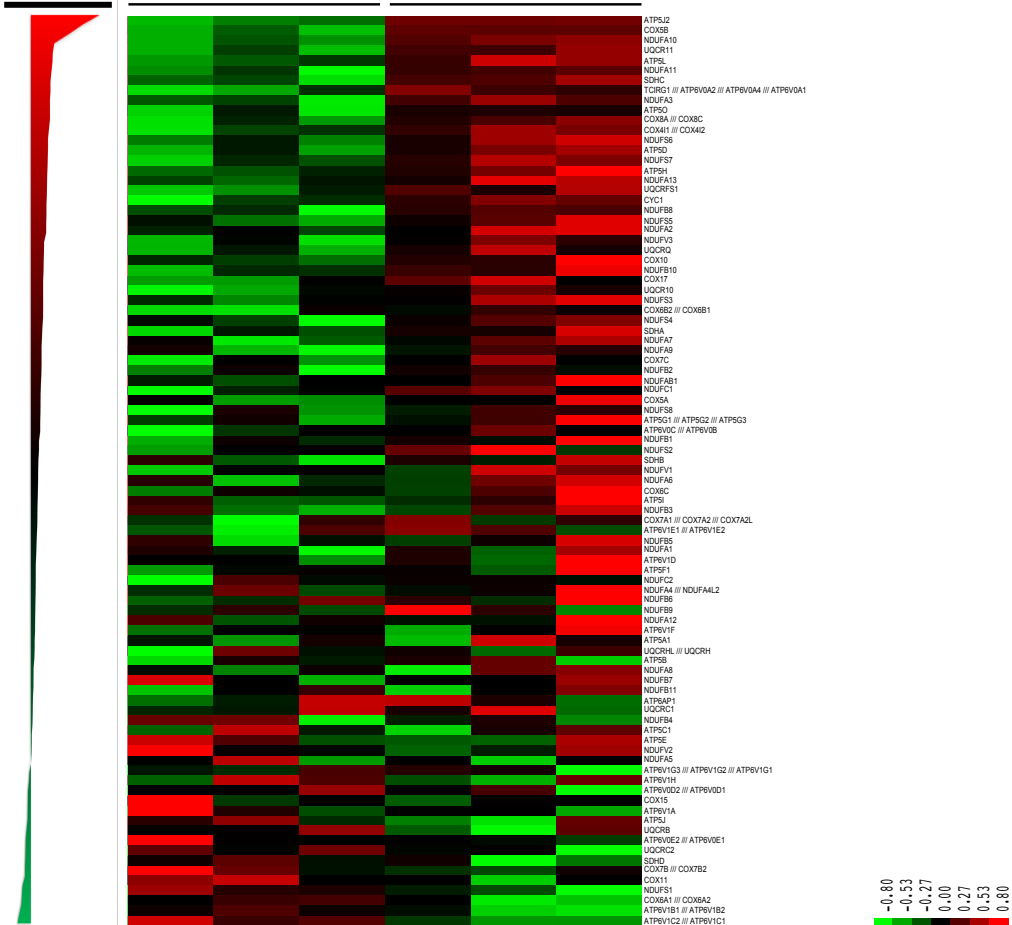

Supplement: pone.0064561.s002.pdf [file pone.0064561.s002.pdf]
